# Supplementary material
Source: Springer Nature journal article supplement (https://mijn.bsl.nl/resource/supplementary/13047_2011_460_MOESM1_ESM.pdf/7111726)
Supplement: MOESM1 [file 7111726]

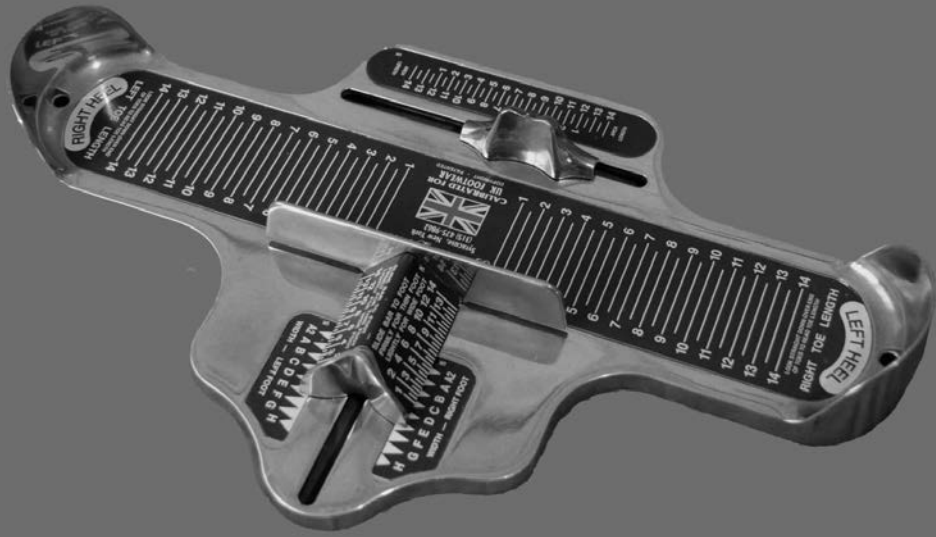

RIGHT HEEL  
RIGHT FOOT  
LEFT FOOT

14 13 12 11 10 9 8 7 6 5 4 3 2 1

14 13 12 11 10 9 8 7 6 5 4 3 2 1

CALIBRATED FOR  
UK FOOTWEAR  
SPECIAL NEW TOOL  
DESIGNED BY  
BRANNOCK

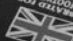

1 2 3 4 5 6 7 8 9 10 11 12 13 14

LEFT HEEL  
RIGHT TOE LENGTH

RIGHT FOOT  
LEFT FOOT

1 2 3 4 5 6 7 8 9 10 11 12 13 14

RIGHT FOOT  
LEFT FOOT
